# Supplementary material
Source: ML conference proceedings conference paper supplement (https://openaccess.thecvf.com/content/CVPR2024/html/Ni_Enhancing_Visual_Continual_CVPR_2024_paper.html)
Supplement: Supplementary file 1 [file Ni_Enhancing_Visual_Continual_CVPR_2024_supplemental.pdf]

# Enhancing Visual Continual Learning with Language-Guided Supervision

## Supplementary Materials

Bolin Ni<sup>1,2\*</sup>, Hongbo Zhao<sup>1,2\*</sup>, Chenghao Zhang<sup>1,2</sup>, Ke Hu<sup>2</sup>  
Gaofeng Meng<sup>1,2,3†</sup>, Zhaoxiang Zhang<sup>1,2,3</sup>, Shiming Xiang<sup>1,2</sup>

<sup>1</sup>State Key Laboratory of Multimodal Artificial Intelligence Systems, Institute of Automation, Chinese Academy of Sciences.

<sup>2</sup>School of Artificial Intelligence, University of Chinese Academy of Sciences.

<sup>3</sup>Centre for Artificial Intelligence and Robotics, HK Institute of Science & Innovation, Chinese Academy of Sciences.

nibolin2019@ia.ac.cn

gfmeng@nlpr.ia.ac.cn

In this supplementary material, we provide additional details regarding the main manuscript. More specifically:

- In Sec. 1, we provide further explanation of the datasets, protocols and metrics.
- In Sec. 2, we provide the detailed hyperparameters of different continual learning settings.
- In Sec. 3, we provide additional experiments and results.

### 1. Datasets, Protocols and Metrics

In Sec. 1.1, we present the statistical information for the datasets used in our experiments. In Sec. 1.2, we describe the continual learning protocols that are commonly used in the literature. Finally, in Sec. 1.3, we introduce the evaluation metrics used to measure the performance comprehensively.

#### 1.1. Datasets statistics

- *Split-CIFAR-100 (Task-IL)*. The CIFAR100 dataset [8] comprises 60,000 32×32 images belonging to 100 classes. In task-incremental learning setting, Split-CIFAR-100 splits the original CIFAR-100 [8] into 10 tasks, 10 disjoint classes per task.
- *CIFAR-100 (Class-IL)*. In the class-incremental learning setting, we divide the classes into mutually exclusive sets. The first task consists of  $B$  classes, and each subsequent task consists of  $C$  classes.
- *ImageNet-100 (Class-IL)*. ImageNet-100 [13] is the subset of ImageNet1000 [3] containing 100 classes [13]. These classes are selected from the first 100 classes after a random shuffle with seed 1,993 [19]. Each image is represented by 224×224 pixels.
- *OfficeHome (Domain-IL)*. OfficeHome [16] consists of images from four different domains: Artistic images, Clip

Art, Product images and Real-World images. For each domain, the dataset contains images of 65 object categories found typically in Office and Home settings. Each image is represented by 224×224 pixels.

We use the official categories provided by the respective dataset creators for all datasets, which can be accessed through the dataset resources [3, 8, 16]. These categories are also presented in Fig. 1, Fig. 3, and Fig. 2 for CIFAR100, ImageNet100, and OfficeHome, respectively.

#### 1.2. Continual Learning Protocols

In continual learning (CL), the model is trained in a task-by-task manner. We define a sequence of tasks denoted by  $\mathcal{D} = \{\mathcal{D}_1, \dots, \mathcal{D}_T\}$ . The  $t$ -th task, denoted by  $\mathcal{D}_t = \{(\mathbf{x}_i^t, y_i^t)\}_{i=1}^{n_t}$ , comprises tuples consisting of an input sample  $\mathbf{x}^t \in \mathcal{X}_t$  and its corresponding label  $y^t \in \mathcal{Y}_t$ . Depending on the target set and the number of training samples, CL protocols can be divided into four common categories:

- *Task-incremental learning* where the target set of test sample  $\mathbf{x}^t$  is  $\mathcal{Y}_t$ .
- *Class-incremental learning* where the target set of test sample  $\mathbf{x}^t$  is  $\cup_{i=1}^t \mathcal{Y}_i$ .
- *Few-shot Class-incremental learning* where the target set of test sample  $\mathbf{x}^t$  is  $\cup_{i=1}^t \mathcal{Y}_i$  and the  $n_t (t > 1)$  of training set is limited.
- *Domain-incremental learning* where each task shares the same target set, *i.e.*,  $\mathcal{Y}_1 = \mathcal{Y}_2 = \dots = \mathcal{Y}_T$ .

#### 1.3. Evaluation Metrics

Formally, suppose the model is conducted for  $N$  tasks and let  $A_{i,j}$  denote the classification accuracy evaluated on the test set of the task  $i$  after the incremental learning of the  $j$ -th task is  $A_{i,j}$ . Our method is extensively evaluated by three commonly used metrics:

\*Equal contribution. †Corresponding author.

| Method                             | $B=50, C=10$                              |                                 |                                 | $B=50, C=5$                     |                                 |                                 | $B=50, C=2$                     |                                 |                                 |
|------------------------------------|-------------------------------------------|---------------------------------|---------------------------------|---------------------------------|---------------------------------|---------------------------------|---------------------------------|---------------------------------|---------------------------------|
|                                    | Avg ( $\uparrow$ )                        | Last ( $\uparrow$ )             | $\mathcal{F}$ ( $\downarrow$ )  | Avg ( $\uparrow$ )              | Last ( $\uparrow$ )             | $\mathcal{F}$ ( $\downarrow$ )  | Avg ( $\uparrow$ )              | Last ( $\uparrow$ )             | $\mathcal{F}$ ( $\downarrow$ )  |
| Oracle                             | 77.6                                      | 77.6                            | -                               | 77.6                            | 77.6                            | -                               | 77.6                            | 77.6                            | -                               |
| w/ Ours                            | 78.0                                      | 78.0                            | -                               | 78.0                            | 78.0                            | -                               | 78.0                            | 78.0                            | -                               |
| <i>Distillation-based methods</i>  |                                           |                                 |                                 |                                 |                                 |                                 |                                 |                                 |                                 |
| LUCIR [5]                          | 65.9 $\pm$ 1.7                            | 55.8 $\pm$ 1.7                  | 24.9 $\pm$ 1.7                  | 60.9 $\pm$ 1.1                  | 51.4 $\pm$ 0.4                  | 26.7 $\pm$ 1.5                  | 52.9 $\pm$ 0.5                  | 42.5 $\pm$ 1.5                  | 34.0 $\pm$ 0.6                  |
| w/ Ours                            | <b>67.5</b> $\pm$ 0.8<br>(+1.6) $\pm$ 1.2 | <b>57.1</b> $\pm$ 1.5<br>(+1.3) | <b>22.5</b> $\pm$ 0.6<br>(-2.4) | <b>62.1</b> $\pm$ 1.9<br>(+1.2) | <b>53.2</b> $\pm$ 2.0<br>(+1.8) | <b>22.4</b> $\pm$ 1.6<br>(-4.3) | <b>53.5</b> $\pm$ 1.2<br>(+0.6) | <b>43.4</b> $\pm$ 1.6<br>(+0.9) | <b>31.2</b> $\pm$ 0.5<br>(-2.8) |
| BiC [17]                           | 63.5 $\pm$ 0.9                            | 51.2 $\pm$ 0.5                  | 16.2 $\pm$ 1.0                  | 57.0 $\pm$ 0.1                  | 45.0 $\pm$ 0.9                  | 15.9 $\pm$ 1.0                  | 44.6 $\pm$ 0.0                  | 33.2 $\pm$ 0.8                  | 11.1 $\pm$ 0.7                  |
| w/ Ours                            | <b>64.7</b> $\pm$ 0.9<br>(+1.2)           | <b>52.4</b> $\pm$ 0.8<br>(+1.2) | <b>11.8</b> $\pm$ 1.0<br>(-4.4) | <b>58.6</b> $\pm$ 0.5<br>(+1.6) | <b>46.3</b> $\pm$ 0.9<br>(+1.3) | <b>14.5</b> $\pm$ 0.8<br>(-1.4) | <b>46.7</b> $\pm$ 0.6<br>(+2.1) | <b>35.1</b> $\pm$ 0.9<br>(+1.9) | <b>6.3</b> $\pm$ 0.8<br>(-4.8)  |
| <i>Rectification-based methods</i> |                                           |                                 |                                 |                                 |                                 |                                 |                                 |                                 |                                 |
| CwD [15]                           | 66.9 $\pm$ 0.3                            | 57.4 $\pm$ 0.8                  | 23.4 $\pm$ 0.9                  | 62.3 $\pm$ 0.8                  | 52.5 $\pm$ 0.7                  | 26.9 $\pm$ 0.6                  | 56.3 $\pm$ 0.4                  | 44.7 $\pm$ 0.8                  | 36.2 $\pm$ 0.5                  |
| w/ Ours                            | <b>68.0</b> $\pm$ 0.4<br>(+1.1)           | <b>58.4</b> $\pm$ 0.2<br>(+1.0) | <b>22.8</b> $\pm$ 0.9<br>(-0.6) | <b>63.3</b> $\pm$ 1.0<br>(+1.0) | <b>53.6</b> $\pm$ 0.5<br>(+1.1) | <b>26.0</b> $\pm$ 0.5<br>(-0.9) | <b>58.3</b> $\pm$ 0.2<br>(+2.0) | <b>46.1</b> $\pm$ 0.5<br>(+1.4) | <b>34.1</b> $\pm$ 0.3<br>(-2.1) |
| IL2M [2]                           | 65.7 $\pm$ 0.1                            | 55.9 $\pm$ 0.3                  | 25.2 $\pm$ 0.7                  | 59.9 $\pm$ 0.6                  | 49.9 $\pm$ 0.1                  | 29.7 $\pm$ 0.2                  | 52.5 $\pm$ 0.8                  | 42.0 $\pm$ 0.3                  | 35.3 $\pm$ 0.6                  |
| w/ Ours                            | <b>68.5</b> $\pm$ 0.2<br>(+2.8)           | <b>59.2</b> $\pm$ 0.6<br>(+3.3) | <b>21.2</b> $\pm$ 0.2<br>(-4.0) | <b>60.8</b> $\pm$ 0.9<br>(+0.9) | <b>49.8</b> $\pm$ 0.7<br>(-0.1) | <b>29.4</b> $\pm$ 0.5<br>(-0.3) | <b>54.0</b> $\pm$ 0.4<br>(+1.5) | <b>45.7</b> $\pm$ 0.5<br>(+3.7) | <b>29.2</b> $\pm$ 0.3<br>(-6.1) |

Table 1. Results on class-incremental experiments on CIFAR100 of Average accuracy (%), last phase accuracy (%) and forgetting rate  $\mathcal{F}$  (%) with and without language-guided representation at various CL settings.  $B$  denotes the number of classes at initial task,  $C$  denotes the number of classes in each task after the initial one.

| Method                 | $K=4$                           |                                 |                                  | $K=8$                            |                                 |                                  | $K=16$                           |                                 |                                  | $K=32$                           |                                 |                                  |
|------------------------|---------------------------------|---------------------------------|----------------------------------|----------------------------------|---------------------------------|----------------------------------|----------------------------------|---------------------------------|----------------------------------|----------------------------------|---------------------------------|----------------------------------|
|                        | Avg ( $\uparrow$ )              | Last ( $\uparrow$ )             | $\mathcal{F}$ ( $\downarrow$ )   | Avg ( $\uparrow$ )               | Last ( $\uparrow$ )             | $\mathcal{F}$ ( $\downarrow$ )   | Avg ( $\uparrow$ )               | Last ( $\uparrow$ )             | $\mathcal{F}$ ( $\downarrow$ )   | Avg ( $\uparrow$ )               | Last ( $\uparrow$ )             | $\mathcal{F}$ ( $\downarrow$ )   |
| <i>Buffer size = 0</i> |                                 |                                 |                                  |                                  |                                 |                                  |                                  |                                 |                                  |                                  |                                 |                                  |
| LUCIR [5]              | 13.9 $\pm$ 0.4                  | 7.3 $\pm$ 0.6                   | 40.9 $\pm$ 0.4                   | 23.1 $\pm$ 0.8                   | 10.7 $\pm$ 1.0                  | 52.3 $\pm$ 0.6                   | 30.9 $\pm$ 0.3                   | 12.8 $\pm$ 0.1                  | 53.1 $\pm$ 0.1                   | 32.3 $\pm$ 0.3                   | 12.9 $\pm$ 0.8                  | 57.4 $\pm$ 0.8                   |
| w/ Ours                | <b>13.9</b> $\pm$ 0.2<br>(+0.0) | <b>6.0</b> $\pm$ 0.9<br>(-1.3)  | <b>30.2</b> $\pm$ 0.5<br>(-10.7) | <b>36.9</b> $\pm$ 0.4<br>(+13.8) | <b>12.7</b> $\pm$ 0.5<br>(+2.0) | <b>38.1</b> $\pm$ 0.3<br>(-14.2) | <b>45.4</b> $\pm$ 0.8<br>(+14.5) | <b>20.0</b> $\pm$ 0.9<br>(+7.2) | <b>35.9</b> $\pm$ 0.2<br>(-17.2) | <b>46.3</b> $\pm$ 0.6<br>(+14.0) | <b>20.4</b> $\pm$ 0.5<br>(+7.5) | <b>41.6</b> $\pm$ 0.1<br>(-15.8) |
| <i>Buffer size = 1</i> |                                 |                                 |                                  |                                  |                                 |                                  |                                  |                                 |                                  |                                  |                                 |                                  |
| LUCIR [5]              | 39.1 $\pm$ 0.2                  | 15.2 $\pm$ 0.3                  | 29.1 $\pm$ 0.9                   | 40.2 $\pm$ 0.1                   | 18.7 $\pm$ 0.5                  | 35.0 $\pm$ 0.4                   | 31.1 $\pm$ 0.8                   | 19.2 $\pm$ 0.4                  | 31.7 $\pm$ 0.4                   | 38.7 $\pm$ 0.9                   | 23.9 $\pm$ 0.0                  | 37.9 $\pm$ 0.3                   |
| w/ Ours                | <b>41.6</b> $\pm$ 0.2<br>(+2.5) | <b>19.3</b> $\pm$ 0.9<br>(+4.1) | <b>10.6</b> $\pm$ 0.2<br>(-18.5) | <b>44.9</b> $\pm$ 0.8<br>(+4.7)  | <b>21.8</b> $\pm$ 0.8<br>(+3.1) | <b>13.3</b> $\pm$ 0.2<br>(-21.7) | <b>38.9</b> $\pm$ 0.3<br>(+7.8)  | <b>24.7</b> $\pm$ 0.2<br>(+5.5) | <b>13.8</b> $\pm$ 0.5<br>(-17.9) | <b>44.9</b> $\pm$ 0.6<br>(+6.2)  | <b>29.2</b> $\pm$ 0.3<br>(+5.3) | <b>18.9</b> $\pm$ 0.9<br>(-19.0) |

Table 2. Results on few-shot class-incremental experiments on ImageNet100 under  $B = 50, C = 10$ .

- *Last-step accuracy (Last)* which measures the overall performance at last:

$$Last = \frac{1}{N} \sum_{i=1}^N A_{i,N} \quad (1)$$

- *Average incremental accuracy (Avg)* which measure the performance evolution along the learning trajectory:

$$Avg = \frac{1}{N} \sum_{j=1}^N \left( \frac{1}{j} \sum_{i=1}^j A_{i,j} \right) \quad (2)$$

- *Forgetting rate (Forget)* which measures the degree of forgetting on learned tasks:

$$Forget = \frac{1}{N-1} \sum_{i=1}^{N-1} \max\{A_{i,1}, \dots, A_{i,N-1}\} - A_{i,N} \quad (3)$$

Besides, following [12], we perform a subspace similarity analysis to measure the representation drifting. Given the

input from the same task, let  $\mathbf{F}_t, \mathbf{F}_{t'} \in \mathbb{R}^{n \times d}$  denote the output of the encoder after the  $t$ -th task and after the  $t'$ -th task ( $t' > t$ ), respectively. We compute the PCA decomposition of  $\mathbf{F}_t$ , i.e., the eigenvectors  $(v_1, v_2, \dots)$  of  $\mathbf{F}_t^T \mathbf{F}_t$ . Let  $\mathbf{V}_{k,t}$  are the top- $k$  principal directions of  $\mathbf{F}_t$ , and  $\mathbf{V}_{k,t'}$  the corresponding matrix for  $\mathbf{F}_{t'}$ . The representation drifting from the  $t$ -th task to the  $t'$ -th can be defined as:

$$\text{RepreDrift}_k(\mathbf{F}_t, \mathbf{F}_{t'}) = 1 - \frac{1}{k} \|\mathbf{V}_{k,t}^T \mathbf{V}_{k,t'}\|_F^2. \quad (4)$$

$\frac{1}{k} \|\mathbf{V}_{k,t}^T \mathbf{V}_{k,t'}\|_F^2$  measures the similarity of the subspaces spanned by  $\mathbf{F}_t$  and  $\mathbf{F}_{t'}$ . The smaller the similarity between the subspaces at task  $t$  and  $t'$ , the greater the representation drifting.

## 2. Hyperparameter details

We provide the detailed hyperparameters of class-incremental learning, task-incremental learning, and domain-incremental experiments in Sec. 2.1, Sec. 2.2 and Sec. 2.3, respectively.

| # | Template                | Avg ( $\uparrow$ ) | Last ( $\uparrow$ ) | $\mathcal{F}$ ( $\downarrow$ ) |
|---|-------------------------|--------------------|---------------------|--------------------------------|
| 1 | Baseline                | 65.9%              | 55.8%               | 24.9%                          |
| 2 | {object}                | 67.5%              | 57.1%               | 22.5%                          |
| 3 | a photo of a {object}   | 67.5%              | 57.5%               | 22.5%                          |
| 4 | Templates ensemble [11] | 67.2%              | 57.9%               | 21.7%                          |

Table 3. Comparison with different prompting techniques on CIFAR-100 under class-incremental setting  $B = 50, C = 10$ .

## 2.1. Class-incremental learning

For CNN-based methods [2, 5, 9, 15, 17], we employ the SGD optimizer [14] with an initial learning rate of 0.1, a momentum of 0.9, and a batch size of 128. In the experiments performed on CIFAR100, all models are trained for 160 epochs within each task, with the learning rate decreased by a factor of 10 at the 80-th and 120-th epochs. For ImageNet100, all models are trained for 90 epochs within each task, with the learning rate reduced by a factor of 10 at the 30-th and 60-th epochs.

For ViT-based methods such as DyTox [4], we follow the original hyperparameters. We train the model for 500 epochs per task with Adam [6] with a learning rate of  $5e-4$ , including 5 epochs of warmup. At the end of each task (except the first), we finetune the model for 20 epochs with a learning rate of  $5e-5$  on a balanced dataset.

## 2.2. Task-incremental learning

The learning rate starts from  $1e-4$  and decays at epochs 30 and 60 with a multiplier of 0.1. The total epochs are 80. The batch size is set to 32. The regularization coefficient of EWC [7], MAS [1] and SI [18] are set to 100, 0.1 and 10, respectively.

## 2.3. Domain-incremental learning

We use the Adam [6] optimizer with an initial learning rate 0.001, and a batch size of 128. The epochs are 80 and the learning rate is decay by 10 at the 40-th and 60-th epochs. The regularization coefficients of EWC [7], MAS [1], SI [18] and GEM [10] are set to 100, 0.1, 0.3 and 5, respectively.

## 3. Additional Experiments Analysis

In Sec. 3.1 and Sec. 3.2, we present additional results on class-incremental learning and few-shot class-incremental learning experiments, respectively. Moreover, in Sec. 3.3, we offer an analysis of the prompting technique.

### 3.1. Class-incremental Learning

In the main manuscript, Table 1 presents the results of class-incremental learning (CIL) experiments on CIFAR100 under the setting where the number of base classes ( $B$ ) equals the

number of incremental classes ( $C$ ). To provide further insights, we supplement additional results under the setting where  $B = 50$  in Tab. 1. The results show that our proposed method consistently and significantly improves the performance across all metrics under the  $B = 50$  setting. These results provide further evidence of the effectiveness of our approach in various CIL settings.

### 3.2. Few-shot Class-incremental Learning

The results of few-shot class-incremental learning are displayed in Figure 7 of the main manuscript. To provide more quantitative results, we also present them in Tab. 2. It is evident that our proposed approach consistently achieves significant performance gains, with or without buffers. These findings provide further evidence that our method facilitates effective knowledge transfer from the initial well-learned task.

### 3.3. Prompting Technique

Prompting [11] is a widely used technique to transfer knowledge from pretrained language models. In Tab. 3, we compare three different settings for prompting. In setting #1, we used the category name as input without any additional templates. In setting #2, we used the template a photo of a {object}. Finally, in setting #3 [11], we averaged the results of 80 different templates. Our results show that the use of templates can slightly ease the forgetting, which we attribute to the fact that the template ensemble enhances the stability of the generated features and reduces the effect of noise. These findings highlight the robustness and generalizability of our approach.

|             |           |            |            |            |
|-------------|-----------|------------|------------|------------|
| apple       | clock     | lion       | plate      | pepper     |
| aquarium    | cloud     | lizard     | poppy      | table      |
| fish        | cockroach | lobster    | porcupine  | tank       |
| baby        | couch     | man        | possum     | telephone  |
| bear        | crab      | maple      | rabbit     | television |
| beaver      | crocodile | tree       | raccoon    | tiger      |
| bed         | cup       | motorcycle | ray        | tractor    |
| bee         | dinosaur  | mountain   | road       | train      |
| beetle      | dolphin   | mouse      | rocket     | trout      |
| bicycle     | elephant  | mushroom   | rose       | tulip      |
| bottle      | flatfish  | oak        | sea        | turtle     |
| bowl        | forest    | tree       | seal       | wardrobe   |
| boy         | fox       | orange     | shark      | whale      |
| bridge      | girl      | orchid     | shrew      | willow     |
| bus         | hamster   | otter      | skunk      | tree       |
| butterfly   | house     | palm       | skyscraper | wolf       |
| camel       | kangaroo  | tree       | snail      | woman      |
| can         | computer  | pear       | snake      | worm       |
| castle      | keyboard  | pickup     | spider     |            |
| caterpillar | lamp      | truck      | squirrel   |            |
| cattle      | lawn      | pine       | streetcar  |            |
| chair       | mower     | tree       | sunflower  |            |
| chimpanzee  | leopard   | plain      | sweet      |            |

Figure 1. The categories of CIFAR100.

|            |            |              |             |                            |                        |
|------------|------------|--------------|-------------|----------------------------|------------------------|
| Alarm      | Eraser     | Monitor      | Screwdriver | eastern hog-nosed snake    | silver salmon          |
| Clock      | Exit Sign  | Mop          | Shelf       | rooster                    | remote control         |
| Backpack   | Fan        | Mouse        | Sink        | wardrobe                   | chain mail             |
| Batteries  | File       | Mug          | Sneakers    | corkscrew                  | swim trunks / shorts   |
| Bed        | Cabinet    | Notebook     | Soda        | isopod                     | white stork            |
| Bike       | Flipflops  | Oven         | Speaker     | beaver                     | teddy bear             |
| Bottle     | Flowers    | Pan          | Spoon       | acorn                      | moped                  |
| Bucket     | Folder     | Paper Clip   | TV          | goldfinch                  | horse chestnut seed    |
| Calculator | Fork       | Pen          | Table       | Siamese cat                | holster                |
| Calendar   | Glasses    | Pencil       | Telephone   | chiffonier                 | ping-pong ball         |
| Candles    | Hammer     | Postit       | ToothBrush  | bittern bird               | purse                  |
| Chair      | Helmet     | Notes        | Toys        | screw                      | indigo bunting         |
| Clipboards | Kettle     | Printer      | Trash Can   | Cairn Terrier              | wolf spider            |
| Computer   | Keyboard   | Push Pin     | Webcam      | valley                     | lighthouse             |
| Couch      | Knives     | Radio        |             | lens cap                   | sturgeon               |
| Curtains   | Lamp Shade | Refrigerator |             | Brittany dog               | toaster                |
| Desk Lamp  | Laptop     | Ruler        |             | Appenzeller Sennenhund     | Arctic fox             |
| Drill      | Marker     | Scissors     |             | entertainment center       | doormat                |
|            |            |              |             | Greater Swiss Mountain Dog | southern black widow   |
|            |            |              |             | Band-Aid                   | high-speed train       |
|            |            |              |             | dhole                      | vending machine        |
|            |            |              |             | sea anemone                | cricket insect         |
|            |            |              |             | ice cream                  | longhorn beetle        |
|            |            |              |             | threshing machine          | African rock python    |
|            |            |              |             | bell or wind chime         | red wine               |
|            |            |              |             | sunglasses                 | assault rifle          |
|            |            |              |             | can opener                 | carbonara              |
|            |            |              |             | microphone                 | CRT monitor            |
|            |            |              |             | quail                      | candy store            |
|            |            |              |             | brussels griffon           | academic gown          |
|            |            |              |             | computer keyboard          | cannon                 |
|            |            |              |             | hand-held computer         | music speaker          |
|            |            |              |             | eel                        | African wild dog       |
|            |            |              |             | Norwegian Elkhound         | farm plow              |
|            |            |              |             | mailbox                    | koala                  |
|            |            |              |             | leopard                    | crutch                 |
|            |            |              |             | mitten                     | Groenendael dog        |
|            |            |              |             | Cocker Spaniel             | Norwich Terrier        |
|            |            |              |             | split-rail fence           | cardboard box / carton |
|            |            |              |             | dowitcher                  | combination lock       |
|            |            |              |             | tennis ball                | candle                 |
|            |            |              |             | Afghan Hound               | Windsor tie            |
|            |            |              |             | parking meter              | pan flute              |
|            |            |              |             | snow leopard               | rose hip               |
|            |            |              |             | spiny lobster              | small white butterfly  |
|            |            |              |             | monarch butterfly          | space shuttle          |
|            |            |              |             | hook                       | Chow Chow              |
|            |            |              |             | drumstick                  | wool                   |
|            |            |              |             | toilet paper               | ring binder            |
|            |            |              |             | sawmill                    | alligator lizard       |

Figure 2. The categories of OfficeHome.

## References

- [1] Rahaf Aljundi, Francesca Babiloni, Mohamed Elhoseiny, Marcus Rohrbach, and Tinne Tuytelaars. Memory aware synapses: Learning what (not) to forget. In *ECCV*, pages 139–154, 2018. [3](#)
- [2] Eden Belouadah and Adrian Popescu. Il2m: Class incremental learning with dual memory. In *CVPR*, pages 583–592, 2019. [2, 3](#)
- [3] Jia Deng, Wei Dong, Richard Socher, Li-Jia Li, Kai Li, and Li Fei-Fei. Imagenet: A large-scale hierarchical image database. In *CVPR*, 2009. [1](#)
- [4] Arthur Douillard, Alexandre Ramé, Guillaume Couairon, and Matthieu Cord. Dytox: Transformers for continual learning with dynamic token expansion. In *CVPR*, 2022. [3](#)
- [5] Saihui Hou, Xinyu Pan, Chen Change Loy, Zilei Wang, and Dahua Lin. Learning a unified classifier incrementally via rebalancing. In *CVPR*, pages 831–839, 2019. [2, 3](#)
- [6] Diederik P Kingma and Jimmy Ba. Adam: A method for stochastic optimization. *arXiv preprint arXiv:1412.6980*, 2014. [3](#)
- [7] James Kirkpatrick, Razvan Pascanu, Neil Rabinowitz, Joel Veness, Guillaume Desjardins, Andrei A Rusu, Kieran Milan, John Quan, Tiago Ramalho, Agnieszka Grabska-Barwinska, et al. Overcoming catastrophic forgetting in neural networks. *PNAS*, 114(13):3521–3526, 2017. [3](#)
- [8] Alex Krizhevsky et al. Learning multiple layers of features from tiny images. 2009. [1](#)
- [9] Yaoyao Liu, Bernt Schiele, and Qianru Sun. Adaptive aggregation networks for class-incremental learning. In *CVPR*, pages 2544–2553, 2021. [3](#)
- [10] David Lopez-Paz and Marc’Aurelio Ranzato. Gradient episodic memory for continual learning. In *NeurIPS*, 2017. [3](#)
- [11] Alec Radford, Jong Wook Kim, Chris Hallacy, Aditya Ramesh, Gabriel Goh, Sandhini Agarwal, Girish Sastry, Amanda Askell, Pamela Mishkin, Jack Clark, et al. Learning transferable visual models from natural language supervision. In *ICML*, pages 8748–8763. PMLR, 2021. [3](#)
- [12] Vinay V Ramasesh, Ethan Dyer, and Maithra Raghu.

|                            |                        |
|----------------------------|------------------------|
| eastern hog-nosed snake    | silver salmon          |
| rooster                    | remote control         |
| wardrobe                   | chain mail             |
| corkscrew                  | swim trunks / shorts   |
| isopod                     | white stork            |
| beaver                     | teddy bear             |
| acorn                      | moped                  |
| goldfinch                  | horse chestnut seed    |
| Siamese cat                | holster                |
| chiffonier                 | ping-pong ball         |
| bittern bird               | purse                  |
| screw                      | indigo bunting         |
| Cairn Terrier              | wolf spider            |
| valley                     | lighthouse             |
| lens cap                   | sturgeon               |
| Brittany dog               | toaster                |
| Appenzeller Sennenhund     | Arctic fox             |
| entertainment center       | doormat                |
| Greater Swiss Mountain Dog | southern black widow   |
| Band-Aid                   | high-speed train       |
| dhole                      | vending machine        |
| sea anemone                | cricket insect         |
| ice cream                  | longhorn beetle        |
| threshing machine          | African rock python    |
| bell or wind chime         | red wine               |
| sunglasses                 | assault rifle          |
| can opener                 | carbonara              |
| microphone                 | CRT monitor            |
| quail                      | candy store            |
| brussels griffon           | academic gown          |
| computer keyboard          | cannon                 |
| hand-held computer         | music speaker          |
| eel                        | African wild dog       |
| Norwegian Elkhound         | farm plow              |
| mailbox                    | koala                  |
| leopard                    | crutch                 |
| mitten                     | Groenendael dog        |
| Cocker Spaniel             | Norwich Terrier        |
| split-rail fence           | cardboard box / carton |
| dowitcher                  | combination lock       |
| tennis ball                | candle                 |
| Afghan Hound               | Windsor tie            |
| parking meter              | pan flute              |
| snow leopard               | rose hip               |
| spiny lobster              | small white butterfly  |
| monarch butterfly          | space shuttle          |
| hook                       | Chow Chow              |
| drumstick                  | wool                   |
| toilet paper               | ring binder            |
| sawmill                    | alligator lizard       |

Figure 3. The categories of ImageNet100.

- Anatomy of catastrophic forgetting: Hidden representations and task semantics. In *ICLR*, 2021. [2](#)
- [13] Sylvestre-Alvise Rebuffi, Alexander Kolesnikov, G. Sperl, and Christoph H. Lampert. icarl: Incremental classifier and representation learning. In *CVPR*, pages 5533–5542, 2017. [1](#)
- [14] Herbert Robbins and Sutton Monro. A stochastic approximation method. *The annals of mathematical statistics*, pages 400–407, 1951. [3](#)
- [15] Yujun Shi, Kuangqi Zhou, Jian Liang, Zihang Jiang, Jiashi Feng, Philip HS Torr, Song Bai, and Vincent YF Tan. Mimicking the oracle: an initial phase decorrelation approach for class incremental learning. In *CVPR*, pages 16722–16731, 2022. [2, 3](#)
- [16] Hemanth Venkateswara, Jose Eusebio, Shayok Chakraborty, and Sethuraman Panchanathan. Deep hashing network for

- unsupervised domain adaptation. In *CVPR*, pages 5018–5027, 2017. [1](#)
- [17] Yue Wu, Yinpeng Chen, Lijuan Wang, Yuancheng Ye, Zicheng Liu, Yandong Guo, and Yun Fu. Large scale incremental learning. In *CVPR*, pages 374–382, 2019. [2](#), [3](#)
- [18] Friedemann Zenke, Ben Poole, and Surya Ganguli. Continual learning through synaptic intelligence. In *ICML*, pages 3987–3995, 2017. [3](#)
- [19] Zhao Zhong, Junjie Yan, Wei Wu, Jing Shao, and Cheng-Lin Liu. Practical block-wise neural network architecture generation. In *CVPR*, pages 2423–2432, 2018. [1](#)
